# Supplementary material
Source: PubMed Central journal article supplement (PMC6525518)
Supplement: pnas.1818081116.sapp.pdf [file pnas.1818081116.sapp.pdf]

## SI Appendix part 1. Supplemental methods

### *Search terms*

We searched Web of Science core collection for all records through 12/31/2016 using the following keywords (TS = topic):

TS = ("alien species" OR "alien organism\*" OR "invasive species" OR "invasive organism\*" OR "species invasion" OR "introduced species" OR "introduced organism\*" OR "species introduced" OR "species introduction" OR "allochthonous species" OR "nonindigenous species" OR "non-indigenous species" OR "nonindigenous organism\*" OR "non-indigenous organism\*" OR "non native species" OR "non-native species" OR "non-native organism\*" OR "exotic species" OR bioinvasion OR "bioinvasive species" OR "bioinvasive organism\*" OR "naturalized species" OR "naturalized organism" OR "naturalised species" OR "naturalised organism") AND TS = (abundance OR density OR cover OR count OR occupancy OR number OR "population size") AND TS = (impact\* OR effect\* OR respons\*)

### *Meta-analysis methods*

The following text provides extended methodological detail and justification of the methods given in the main body of the manuscript. Definition of variables and equation terms are as given in the body text.

Prior to fitting Equation 1, we mean centered the IAS data ( $x$ ) by subtracting the mean  $x$  value associated with the study from each raw data value. Mean centering minimized any dependence between linear and polynomial effect size estimates within studies (1) and was performed for both the partial- $r$  and slopes meta-analyses. This repositioning of the  $x$ -axis to a mean of zero has no impact on invasive abundance–native response shape. This method for effect size estimation allowed us to estimate linear and polynomial partial- $r$  effect sizes for studies where the underlying raw data were on different scales, a key strength of formal meta-analysis (2, 3). Analysis of these effect sizes yielded separate estimates of the

direction and strength of the linear and polynomial (curvature) components of the IAS abundance–native response relationship. However, these effect sizes could not be used to reconstruct the expected shape of the IAS–native relationship, because of the way in which the regression  $t$ -value used to compute effect sizes (Eqn 2) combined information on regression term magnitude and precision, and because there was no obvious IAS abundance prediction interval for plotting results (IAS values in different studies had different units and scales, despite being centered).

The slopes meta-analysis used the three regression terms of Equation 1 as effect size estimates, with the goal of determining the shape of the IAS–native response relationship. This direct meta-analysis of regression parameters assumed (i) that a consistent regression model was used across studies to analyze raw data and generate effect sizes and (ii) that IAS abundance and native response variates ( $x$  and  $y$ ) were comparably distributed among studies (since regression term estimates are scale dependent; 4, 5). We were able to use a common regression equation (Eqn 1) to generate all regression parameter effect sizes because we extracted and had access to raw data from component studies. We transformed the raw data within each study (both invasive abundance,  $x$  and native responses,  $y$ ) to the unit scale (0, 1), satisfying the assumption for comparably distributed raw data. We then mean-centered the rescaled IAS abundance values, as before, prior to analysis using Equation 1 to generate three regression-term effect sizes ( $\beta_0$ ,  $\beta_{\text{linear}}$ ,  $\beta_{\text{poly}}$ ). Transformation to the unit scale was chosen because our raw data (abundance measures, diversity metrics) were bounded within each study by a minimum of zero, and extended to some maximum (depending on the variable in question).

We used Bayesian mixed-effects meta-analyses (MCMCglmm in R version 3.5.1; 6, 7) to analyze the two effect size datasets in order to assess the IAS–native response relationship. We examined the distributions of effect sizes and  $mev$  and excluded one study because its polynomial regression term was an extreme outlier. The  $mev$ , assumed to be known without error, were fitted as a set of within-effect-size variance estimates, to weight the meta-analyses. Paper identity was included as a set of random effects to account for the non-independence of studies in the same paper (sharing common methodology, location,

time period and taxonomic scope). Paper-level and residual random effects were normally distributed. Prior distributions for random effects were non-informative uniform distributions on the standard deviation of the random effects (8). We accepted default settings for the priors for fixed effects (7). Posterior distributions for model parameters were extracted from models as MCMC samples of size 1000. MCMC chain parameters (number of iterations, burnin and thin interval) were chosen to maintain effective sample sizes or posterior distributions close to 1000 and to limit chain autocorrelation. Parameter estimates (posterior mean values) were statistically supported (significant) when their posterior 95% credible interval did not include zero. All p-values presented represent the probability that parameters differ from zero, or from each other.

To reconstruct the shape of the relationship between IAS abundance and native responses, posterior mean values for  $\beta_0$ ,  $\beta_{\text{linear}}$ , and  $\beta_{\text{poly}}$  were substituted into Equation 1 and model predictions were made in the rescaled range of the invasive abundance raw data (0, 1). An approximate 95% credible zone was established around the expected regression line using the posterior distributions for  $\beta_0$ ,  $\beta_{\text{linear}}$ , and  $\beta_{\text{poly}}$ . These posteriors (each with sample size 1000) were used to define 1000 alternative regression equations, which were used to calculate 95% credible bounds on the native response (y) axis over the (0, 1) prediction interval of the invasive abundance (x) axis. This credible zone therefore takes into account uncertainty in all three posterior distributions. Our method for reconstructing the expected invasive abundance–native response relationship does not take into account the covariance of regression terms within studies. These covariance estimates are often non-zero for polynomial models fitted using a raw, non-scaled polynomial model matrix, such as we applied to generate effect sizes in Eqn 1. Analysis using the raw polynomial model matrix was, however, desirable as it led to the generation of consistently scaled regression terms (and therefore effect sizes) between studies, which was essential for meta-analysis. The predicted regression equation and its 95% credible zone represent the expected shape of the IAS–native species relationship for the typical range in raw response variables reported in the literature.

Bayesian mixed-effects meta-analyses were fitted with either partial-r or slopes effect sizes as the response variable and the predictors of interest as fixed effects (response level [population or community]; trophic category [above, the same, below]; response type [for community-level studies only; richness, diversity, evenness]; invader taxon [plant, animal]; habitat [terrestrial, fresh water, marine]; study type [spatial, temporal, experimental]). Up to two fixed effects were fitted at one time in each meta-analysis, and no fixed effects interactions were fitted (**Table S1.1**).

**TABLE S1.1:** Meta-analyses fitted to effect size datasets. All models were fitted to both partial-r and slopes effect size datasets. Only the fixed effects specifications are shown. All models contained paper-level random effects and *mev* as described above.

| Model                                  | Figures |
|----------------------------------------|---------|
| ES ~ Response_level                    | 2       |
| ES ~ Trophic_category + Response_level | 3       |
| ES ~ Response_type                     | 4; S3.2 |
| ES ~ Habitat + Trophic_category        | S3.3    |
| ES ~ Taxon + Trophic_category          | S3.4    |
| ES ~ Study_type                        | S3.5    |

Sensitivity analyses were carried out to determine how our data rescaling decisions and how the design of studies that we meta-analyzed (spatial, temporal, experimental) influenced our findings (**SI Appendix, part 3**), and to check for publication bias within the effect size datasets (**Figure S1.1**). Finally, we checked a subset of our meta-analysis results by comparing average effect size estimates with plots of the raw data. In all cases, we detected no biases in the analysis that would influence the main conclusions presented in the paper.

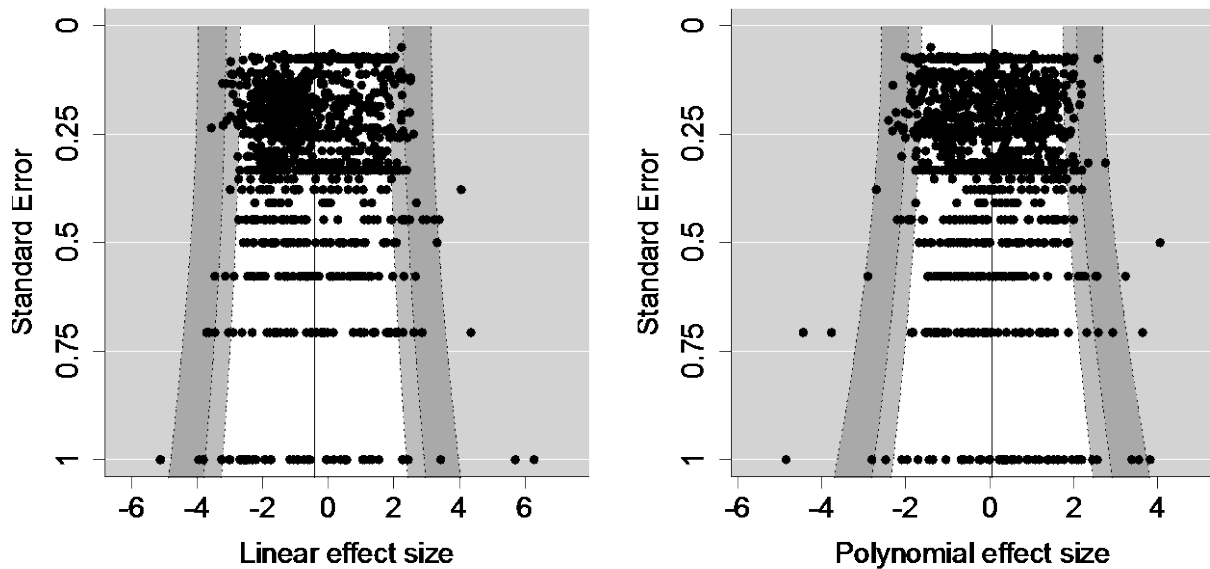

**Figure S1.1** Funnel plots for study-level (mean) invasive abundance–native response effect sizes (partial- $r$  analysis;  $n = 1258$ ). Study-level error variance was taken to be the median measurement error variance within studies. Effect size data are plotted against their standard error (square root of measurement error variance). (a) Funnel plot for linear effect size (b) Funnel plot for polynomial effect size. The vertical line indicates the pooled effect size for a random-effects model with an intercept as the only fixed effect (this model was fitted using the R package *metaphor*; 9). Shaded areas of the funnel give pseudo-confidence interval regions: grey shading, 95% pseudo-confidence interval region; dark grey shading, 99% pseudo-confidence interval region. The pseudo-confidence regions incorporate between-effect size variation. Studies with smaller sample sizes are towards the bottom of the Y-axis and studies with larger sample sizes are towards the top. The funnel plots give no suggestion of publication bias, which would be visible as bias in the distribution of effect sizes with the greatest standard errors.

## SI Appendix I References

1. Schielzeth H (2010) Simple means to improve the interpretability of regression coefficients. *Methods Ecol Evol* 1(2):103–113.
2. Borenstein M, Hedges L, Higgins J, Rothstein H (2009) *Introduction to meta-analysis* (John Wiley & Sons, West Sussex, United Kingdom).

3. Nakagawa S, Cuthill IC (2007) Effect size, confidence interval and statistical significance: a practical guide for biologists. *Biol Rev* 82(4):591–605.
4. Becker BJ, Wu M-J (2007) The Synthesis of Regression Slopes in Meta-Analysis. *Stat Sci* 22(3):414–429.
5. Koricheva J, Gurevitch J, Mengersen K (2013) *Handbook of Meta-analysis in Ecology and Evolution* (Princeton University Press).
6. R Core Team (2018) *R: A Language and Environment for Statistical Computing*. (R Foundation for Statistical Computing, Vienna.) Available at: <https://www.R-project.org>.
7. Hadfield JD (2010) MCMC methods for multi-response generalized linear mixed models: the MCMCglmm R package. *J Stat Softw* 33:1–22.
8. Gelman A (2006) Prior distributions for variance parameters in hierarchical models (comment on article by Browne and Draper). *Bayesian Anal* 1(3):515–534.
9. Viechtbauer W (2010) Conducting Meta-Analyses in R with the **metafor** Package. *J Stat Softw* 36(3). doi:10.18637/jss.v036.i03.

## SI Appendix, part 2. Citations of papers included in the meta-analysis

- Abella, S.R., Chiquoine, L.P., Backer, D.M., 2013. Soil, Vegetation, and Seed Bank of a Sonoran Desert Ecosystem Along an Exotic Plant (*Pennisetum ciliare*) Treatment Gradient. *Environmental Management* 52, 946–957. <https://doi.org/10.1007/s00267-013-0104-y>
- Almeida-Neto, M., Prado, P.I., Kubota, U., Bariani, J.M., Aguirre, G.H., Lewinsohn, T.M., 2010. Invasive grasses and native Asteraceae in the Brazilian Cerrado. *Plant Ecol* 209, 109–122. <https://doi.org/10.1007/s11258-010-9727-8>
- Arismendi, I., Soto, D., Penaluna, B., Jara, C., Leal, C., León-Muñoz, J., 2009. Aquaculture, non-native salmonid invasions and associated declines of native fishes in Northern Patagonian lakes. *Freshwater Biology* 54, 1135–1147. <https://doi.org/10.1111/j.1365-2427.2008.02157.x>
- Attayde, J.L., Brasil, J., Menescal, R.A., 2011. Impacts of introducing Nile tilapia on the fisheries of a tropical reservoir in North-eastern Brazil. *Fisheries Management and Ecology* 18, 437–443. <https://doi.org/10.1111/j.1365-2400.2011.00796.x>
- Avalos, G., Hoell, K., Gardner, J., Anderson, S., Lee, C., 2006. Impact of the invasive plant *Syzygium jambos* (Myrtaceae) on patterns of understory seedling abundance in a Tropical Premontane Forest, Costa Rica. *Revista de Biología Tropical* 54, 415–421.
- Baker, A.C., Murray, B.R., Hose, G.C., 2007. Relating pine-litter intrusion to plant-community structure in native eucalypt woodland adjacent to *Pinus radiata* (Pinaceae) plantations. *Australian Journal of Botany* 55, 521. <https://doi.org/10.1071/BT06135>
- Barbiero, R.P., Rockwell, D.C., 2008. Changes in the Crustacean Communities of the Central Basin of Lake Erie during the First Full Year of the *Bythotrephes longimanus* Invasion. *Journal of Great Lakes Research* 34, 109–121. [https://doi.org/10.3394/0380-1330\(2008\)34\[109:CITCCO\]2.0.CO;2](https://doi.org/10.3394/0380-1330(2008)34[109:CITCCO]2.0.CO;2)
- Bassett, I., Paynter, Q., Hankin, R., Beggs, J.R., 2012. Characterising alligator weed (*Alternanthera philoxeroides*; Amaranthaceae) invasion at a northern New Zealand lake. *New Zealand Journal of Ecology* 36, 216–222.
- Battisti, A., Benvegnù, I., Colombari, F., Haack, R.A., 2014. Invasion by the chestnut gall wasp in Italy causes significant yield loss in *Castanea sativa* nut production. *Agricultural and Forest Entomology* 16, 75–79. <https://doi.org/10.1111/afe.12036>
- Benkwitt, C.E., 2015. Non-linear effects of invasive lionfish density on native coral-reef fish communities. *Biol Invasions* 17, 1383–1395. <https://doi.org/10.1007/s10530-014-0801-3>
- Boets, P., Lock, K., Goethals, P.L.M., 2011. Using long-term monitoring to investigate the changes in species composition in the harbour of Ghent (Belgium). *Hydrobiologia* 663, 155–166. <https://doi.org/10.1007/s10750-010-0567-2>
- Boland, J.M., 2016. The impact of an invasive ambrosia beetle on the riparian habitats of the Tijuana River Valley, California. *PeerJ* 4, e2141. <https://doi.org/10.7717/peerj.2141>
- Both, C., Madalozzo, B., Lingnau, R., Grant, T., 2018. Amphibian richness patterns in Atlantic Forest areas invaded by American bullfrogs. *Austral Ecology* 39, 864–874. <https://doi.org/10.1111/aec.12155>
- Bourdeau, P.E., Pangle, K.L., Peacor, S.D., 2011. The invasive predator *Bythotrephes* induces changes in the vertical distribution of native copepods in Lake Michigan. *Biol Invasions* 13, 2533. <https://doi.org/10.1007/s10530-011-0073-0>
- Boyer, K.E., Burdick, A.P., 2010. Control of *Lepidium latifolium* (perennial pepperweed) and recovery of native plants in tidal marshes of the San Francisco Estuary. *Wetlands Ecol*

- Manage 18, 731–743. <https://doi.org/10.1007/s11273-010-9193-z>
- Braithwaite, R.W., Lonsdale, W.M., Estbergs, J.A., 1989. Alien vegetation and native biota in tropical Australia: the impact of *Mimosa pigra*. *Biological Conservation* 48, 189–210. [https://doi.org/10.1016/0006-3207\(89\)90118-3](https://doi.org/10.1016/0006-3207(89)90118-3)
- Branch, G.M., Odendaal, F., Robinson, T.B., 2010. Competition and facilitation between the alien mussel *Mytilus galloprovincialis* and indigenous species: Moderation by wave action. *Journal of Experimental Marine Biology and Ecology* 383, 65–78. <https://doi.org/10.1016/j.jembe.2009.10.007>
- Brewer, J.S., 2011. Per capita community-level effects of an invasive grass, *Microstegium vimineum*, on vegetation in mesic forests in northern Mississippi (USA). *Biol Invasions* 13, 701–715. <https://doi.org/10.1007/s10530-010-9861-1>
- Burkle, L.A., Mihaljevic, J.R., Smith, K.G., 2012. Effects of an invasive plant transcend ecosystem boundaries through a dragonfly-mediated trophic pathway. *Oecologia* 170, 1045–1052. <https://doi.org/10.1007/s00442-012-2357-1>
- Byers, J.E., Gribben, P.E., Yeager, C., Sotka, E.E., 2012. Impacts of an abundant introduced ecosystem engineer within mudflats of the southeastern US coast. *Biol Invasions* 14, 2587–2600. <https://doi.org/10.1007/s10530-012-0254-5>
- Cable, D.R., 1971. Lehmann Lovegrass on the Santa Rita Experimental Range, 1937-1968 (El Zacate Lehmann Lovegrass en la Estacion Experimental de Santa Rita Durante los Años de 1937-68). *Journal of Range Management* 24, 17–21. <https://doi.org/10.2307/3896058>
- Cai, L.-Z., Hwang, J.-S., Dahms, H.-U., Fu, S.-J., Zhuo, Y., Guo, T., 2014. Effect of the invasive bivalve *Mytilopsis sallei* on the macrofaunal fouling community and the environment of Yundang Lagoon, Xiamen, China. *Hydrobiologia* 741, 101–111. <https://doi.org/10.1007/s10750-014-2012-4>
- Callaway, R.M., Schaffner, U., Thelen, G.C., Khamraev, A., Juginisov, T., Maron, J.L., 2012. Impact of *Acroptilon repens* on co-occurring native plants is greater in the invader's non-native range. *Biol Invasions* 14, 1143–1155. <https://doi.org/10.1007/s10530-011-0145-1>
- Carlsson, N.O.L., Brönmark, C., Hansson, L.-A., 2018. Invading Herbivory: The Golden Apple Snail Alters Ecosystem Functioning in Asian Wetlands. *Ecology* 85, 1575–1580. <https://doi.org/10.1890/03-3146>
- Carniatio, N., Thomaz, S.M., Cunha, E.R., Fugi, R., Ota, R.R., 2013. Effects of an Invasive Alien Poaceae on Aquatic Macrophytes and Fish Communities in a Neotropical Reservoir. *Biotropica* 45, 747–754. <https://doi.org/10.1111/btp.12062>
- Carvalho, L.G., Buckley, Y.M., Memmott, J., 2018. Diet breadth influences how the impact of invasive plants is propagated through food webs. *Ecology* 91, 1063–1074. <https://doi.org/10.1890/08-2092.1>
- Çinar, M.E., Katagan, T., Öztürk, B., Dagli, E., Açıık, S., Bitlis, B., Bakir, K., Dogan, A., 2012. Spatio-temporal distributions of zoobenthos in Mersin Bay (Levantine Sea, eastern Mediterranean) and the importance of alien species in benthic communities. *Marine Biology Research* 8, 954–968. <https://doi.org/10.1080/17451000.2012.706305>
- Clarke, P.J., Latz, P.K., Albrecht, D.E., Collins, B., 2005. Long-term changes in semi-arid vegetation: Invasion of an exotic perennial grass has larger effects than rainfall variability. *Journal of Vegetation Science* 16, 237–248. [https://doi.org/10.1658/1100-9233\(2005\)016\[0237:LCISVI\]2.0.CO;2](https://doi.org/10.1658/1100-9233(2005)016[0237:LCISVI]2.0.CO;2)
- Cooling, M., Sim, D.A., Lester, P.J., 2015. Density-Dependent Effects of an Invasive Ant on a Ground-Dwelling Arthropod Community. *Environmental Entomology* 44, 44–53.



- <https://doi.org/10.1093/ee/nvu008>
- Corenblit, D., Steiger, J., Tabacchi, E., González, E., Planty-Tabacchi, A.-M., 2018. Ecosystem Engineers Modulate Exotic Invasions in Riparian Plant Communities by Modifying Hydrogeomorphic Connectivity. *River Research and Applications* 30, 45–59. <https://doi.org/10.1002/rra.2618>
- Corio, K., Wolf, A., Draney, M., Fewless, G., 2009. Exotic earthworms of great lakes forests: A search for indicator plant species in maple forests. *Forest Ecology and Management* 258, 1059–1066. <https://doi.org/10.1016/j.foreco.2009.05.013>
- Čuda, J., Skálová, H., Janovský, Z., Pyšek, P., 2014. Habitat requirements, short-term population dynamics and coexistence of native and invasive *Impatiens* species: a field study. *Biological Invasions* 16, 177–190. <https://doi.org/10.1007/s10530-013-0512-1>
- Davies, J.N., Boulton, A.J., 2009. Great house, poor food: effects of exotic leaf litter on shredder densities and caddisfly growth in 6 subtropical Australian streams. *Journal of the North American Benthological Society* 28, 491–503. <https://doi.org/10.1899/07-073.1>
- Davis, M.A., Anderson, M.D., Bock-Brownstein, L., Staudenmaier, A., Suliteanu, M., Wareham, A., Dosch, J.J., 2018. Little evidence of native and non-native species influencing one another's abundance and distribution in the herb layer of an oak woodland. *Journal of Vegetation Science* 26, 1005–1012. <https://doi.org/10.1111/jvs.12302>
- de Rivera, C., Grosholz, E., Ruiz, G., 2011. Multiple and long-term effects of an introduced predatory crab. *Marine Ecology Progress Series* 429, 145–155. <https://doi.org/10.3354/meps09101>
- Delefosse, M., Banta, G., Canal-Vergés, P., Penha-Lopes, G., Quintana, C., Valdemarsen, T., Kristensen, E., 2012. Macrobenthic community response to the *Marenzelleria viridis* (Polychaeta) invasion of a Danish estuary. *Marine Ecology Progress Series* 461, 83–94. <https://doi.org/10.3354/meps09821>
- Dietzsch, A.C., Stanley, D.A., Stout, J.C., 2011. Relative abundance of an invasive alien plant affects native pollination processes. *Oecologia* 167, 469–479. <https://doi.org/10.1007/s00442-011-1987-z>
- Dijkstra, J.A., Lambert, W.J., Harris, L.G., 2013. Introduced species provide a novel temporal resource that facilitates native predator population growth. *Biol Invasions* 15, 911–919. <https://doi.org/10.1007/s10530-012-0339-1>
- Dorcas, M.E., Willson, J.D., Reed, R.N., Snow, R.W., Rochford, M.R., Miller, M.A., Meshaka, W.E., Andreadis, P.T., Mazzotti, F.J., Romagosa, C.M., Hart, K.M., 2012. Severe mammal declines coincide with proliferation of invasive Burmese pythons in Everglades National Park. *PNAS* 109, 2418–2422. <https://doi.org/10.1073/pnas.1115226109>
- Drouin, A., McKindsey, C.W., Johnson, L.E., 2011. Higher abundance and diversity in faunal assemblages with the invasion of *Codium fragile* ssp. *fragile* in eelgrass meadows. *Marine Ecology Progress Series* 424, 105–117. <https://doi.org/10.3354/meps08961>
- Duggan, I., 2014. *Skistodiaptomus pallidus* (Copepoda: Diaptomidae) establishment in New Zealand natural lakes, and its effects on zooplankton community composition. *Aquatic Invasions* 9, 195–202. <https://doi.org/10.3391/ai.2014.9.2.08>
- Eash-Loucks, W., Kimball, M., M. Petrinc, K., 2014. Long-term changes in an estuarine mud crab community: Evaluating the impact of non-native species. *Journal of Crustacean Biology* 34, 731–738. <https://doi.org/10.1163/1937240X-00002287>
- Fang, L., Wong, P.K., Lin, L., Lan, C., Qiu, J.-W., 2010. Impact of invasive apple snails in Hong Kong on wetland macrophytes, nutrients, phytoplankton and filamentous algae.

- Freshwater Biology 55, 1191–1204. <https://doi.org/10.1111/j.1365-2427.2009.02343.x>
- Farnsworth, E.J., Ellis, D.R., 2001. Is purple loosestrife (*Lythrum salicaria*) an invasive threat to freshwater wetlands? Conflicting evidence from several ecological metrics. *Wetlands* 21, 199–209. [https://doi.org/10.1672/0277-5212\(2001\)021\[0199:IPLLSA\]2.0.CO;2](https://doi.org/10.1672/0277-5212(2001)021[0199:IPLLSA]2.0.CO;2)
- Fenesi, A., Vágási, C.I., Beldean, M., Földesi, R., Kolcsár, L.-P., Shapiro, J.T., Török, E., Kovács-Hostyánszki, A., 2015. *Solidago canadensis* impacts on native plant and pollinator communities in different-aged old fields. *Basic and Applied Ecology* 16, 335–346. <https://doi.org/10.1016/j.baae.2015.03.003>
- Fierke, M.K., Kauffman, J.B., 2006. Invasive Species Influence Riparian Plant Diversity Along a Successional Gradient, Willamette River, Oregon. *Natural Areas Journal* 26, 376–382. [https://doi.org/10.3375/0885-8608\(2006\)26\[376:ISIRPD\]2.0.CO;2](https://doi.org/10.3375/0885-8608(2006)26[376:ISIRPD]2.0.CO;2)
- Figueroa, J.A., Teillier, S., Castro, S.A., 2011. Diversity patterns and composition of native and exotic floras in central Chile. *Acta Oecologica* 37, 103–109. <https://doi.org/10.1016/j.actao.2011.01.002>
- Fischer, L.K., Lippe, M.V.D., Kowarik, I., 2018. Tree invasion in managed tropical forests facilitates endemic species. *Journal of Biogeography* 36, 2251–2263. <https://doi.org/10.1111/j.1365-2699.2009.02173.x>
- Fleishman, E., Mcdonal, N., Nally, R.M., Murphy, D.D., Walters, J., Floyd, T., 2018. Effects of floristics, physiognomy and non-native vegetation on riparian bird communities in a Mojave Desert watershed. *Journal of Animal Ecology* 72, 484–490. <https://doi.org/10.1046/j.1365-2656.2003.00718.x>
- Fleming, G.M., Diffendorfer, J.E., Zedler, P.H., 2018. The relative importance of disturbance and exotic-plant abundance in California coastal sage scrub. *Ecological Applications* 19, 2210–2227. <https://doi.org/10.1890/07-1959.1>
- Fletcher, L.M., Forrest, B.M., Bell, J.J., 2013. Impacts of the invasive ascidian *Didemnum vexillum* on green-lipped mussel *Perna canaliculus* aquaculture in New Zealand. *Aquaculture Environment Interactions* 4, 17–30. <https://doi.org/10.3354/aei00069>
- Forsyth, D.M., Scroggie, M.P., Arthur, A.D., Lindeman, M., Ramsey, D.S.L., McPhee, S.R., Bloomfield, T., Stuart, I.G., 2018. Density-dependent effects of a widespread invasive herbivore on tree survival and biomass during reforestation. *Ecosphere* 6, art71. <https://doi.org/10.1890/ES14-00453.1>
- Freeman, E.D., Sharp, T.R., Larsen, R.T., Knight, R.N., Slater, S.J., McMillan, B.R., 2014. Negative Effects of an Exotic Grass Invasion on Small-Mammal Communities. *PLOS ONE* 9, e108843. <https://doi.org/10.1371/journal.pone.0108843>
- Galende, G.I., Troncoso, A., Lambertucci, S.A., 2013. Effects of coypu (*Myocastor coypus*) abundances and diet selection on a wetland of the Patagonian steppe. *Studies on Neotropical Fauna and Environment* 48, 32–39. <https://doi.org/10.1080/01650521.2012.753740>
- Geddes, P., Grancharova, T., Kelly, J.J., Treering, D., Tuchman, N.C., 2014. Effects of invasive *Typha × glauca* on wetland nutrient pools, denitrification, and bacterial communities are influenced by time since invasion. *Aquat Ecol* 48, 247–258. <https://doi.org/10.1007/s10452-014-9480-5>
- Gergs, R., Koester, M., Schulz, R.S., Schulz, R., 2018. Potential alteration of cross-ecosystem resource subsidies by an invasive aquatic macroinvertebrate: implications for the terrestrial food web. *Freshwater Biology* 59, 2645–2655. <https://doi.org/10.1111/fwb.12463>

- Giakoumi, S., 2014. Distribution patterns of the invasive herbivore *Siganus luridus* (Rüppell, 1829) and its relation to native benthic communities in the central Aegean Sea, Northeastern Mediterranean. *Marine Ecology* 35, 96–105. <https://doi.org/10.1111/maec.12059>
- Glasby, T.M., 2013. *Caulerpa taxifolia* in seagrass meadows: killer or opportunistic weed? *Biological Invasions* 15, 1017–1035. <https://doi.org/10.1007/s10530-012-0347-1>
- Gleditsch, J.M., Carlo, T.A., 2018. Fruit quantity of invasive shrubs predicts the abundance of common native avian frugivores in central Pennsylvania. *Diversity and Distributions* 17, 244–253. <https://doi.org/10.1111/j.1472-4642.2010.00733.x>
- Gleditsch, J.M., Carlo, T.A., 2014. Living with Aliens: Effects of Invasive Shrub Honeysuckles on Avian Nesting. *PLOS ONE* 9, e107120. <https://doi.org/10.1371/journal.pone.0107120>
- Gois, K.S., Pelicice, F.M., Gomes, L.C., Agostinho, A.A., 2015. Invasion of an Amazonian cichlid in the Upper Paraná River: facilitation by dams and decline of a phylogenetically related species. *Hydrobiologia* 746, 401–413. <https://doi.org/10.1007/s10750-014-2061-8>
- Gonzales, E.K., Wiersma, Y.F., Maher, A.I., Nudds, T.D., 2008. Positive relationship between non-native and native squirrels in an urban landscape. *Can. J. Zool.* 86, 356–363. <https://doi.org/10.1139/Z08-006>
- Gormley, A.M., Holland, E.P., Pech, R.P., Thomson, C., Reddiex, B., 2012. Impacts of an invasive herbivore on indigenous forests. *Journal of Applied Ecology* 49, 1296–1305. <https://doi.org/10.1111/j.1365-2664.2012.02219.x>
- Gornish, E.S., Santos, P.A. dos, 2018. Invasive species cover, soil type, and grazing interact to predict long-term grassland restoration success. *Restoration Ecology* 24, 222–229. <https://doi.org/10.1111/rec.12308>
- Goulson, D., Rotheray, E.L., 2018. Population dynamics of the invasive weed *Lupinus arboreus* in Tasmania, and interactions with two non-native pollinators. *Weed Research* 52, 535–541. <https://doi.org/10.1111/j.1365-3180.2012.00935.x>
- Grabowski, M., Bacela, K., Konopacka, A., Jazdzewski, K., 2009. Salinity-related distribution of alien amphipods in rivers provides refugia for native species. *Biol Invasions* 11, 2107. <https://doi.org/10.1007/s10530-009-9502-8>
- Green, D., Crowe, T., 2013. Physical and biological effects of introduced oysters on biodiversity in an intertidal boulder field. *Marine Ecology Progress Series* 482, 119–132. <https://doi.org/10.3354/meps10241>
- Green, D.S., Crowe, T.P., 2014. Context- and density-dependent effects of introduced oysters on biodiversity. *Biological Invasions* 16, 1145–1163. <https://doi.org/10.1007/s10530-013-0569-x>
- Greenberg, D.A., Green, D.M., 2018. Effects of an Invasive Plant on Population Dynamics in Toads. *Conservation Biology* 27, 1049–1057. <https://doi.org/10.1111/cobi.12078>
- Greene, B.T., Blossey, B., 2012. Lost in the weeds: *Ligustrum sinense* reduces native plant growth and survival. *Biol Invasions* 14, 139–150. <https://doi.org/10.1007/s10530-011-9990-1>
- Gribben, P.E., Byers, J.E., Wright, J.T., Glasby, T.M., 2018. Positive versus negative effects of an invasive ecosystem engineer on different components of a marine ecosystem. *Oikos* 122, 816–824. <https://doi.org/10.1111/j.1600-0706.2012.20868.x>
- Gribben, P.E., Simpson, M., Wright, J.T., 2015. Relationships between an invasive crab, habitat availability and intertidal community structure at biogeographic scales. *Marine Environmental Research* 110, 124–131. <https://doi.org/10.1016/j.marenvres.2015.08.006>

- Griffiths, A.D., McKay, J.L., 2008. Cane toads reduce the abundance and site occupancy of Merten's water monitor (*Varanus mertensi*). *Wildl. Res.* 34, 609–615.  
<https://doi.org/10.1071/WR07024>
- Grosholz, E., Lovell, S., Besedin, E., Katz, M., 2018. Modeling the impacts of the European green crab on commercial shellfisheries. *Ecological Applications* 21, 915–924.  
<https://doi.org/10.1890/09-1657.1>
- Grosholz, E.D., 2005. Recent biological invasion may hasten invasional meltdown by accelerating historical introductions. *PNAS* 102, 1088–1091.  
<https://doi.org/10.1073/pnas.0308547102>
- Guénard, B., Dunn, R.R., 2010. A New (Old), Invasive Ant in the Hardwood Forests of Eastern North America and Its Potentially Widespread Impacts. *PLOS ONE* 5, e11614.  
<https://doi.org/10.1371/journal.pone.0011614>
- Habit, E., Piedra, P., Ruzzante, D.E., Walde, S.J., Belk, M.C., Cussac, V.E., Gonzalez, J., Colin, N., 2018. Changes in the distribution of native fishes in response to introduced species and other anthropogenic effects. *Global Ecology and Biogeography* 19, 697–710.  
<https://doi.org/10.1111/j.1466-8238.2010.00541.x>
- Hale, C.M., Frelich, L.E., Reich, P.B., 2018. Changes in Hardwood Forest Understory Plant Communities in Response to European Earthworm Invasions. *Ecology* 87, 1637–1649.  
[https://doi.org/10.1890/0012-9658\(2006\)87\[1637:CIHFUP\]2.0.CO;2](https://doi.org/10.1890/0012-9658(2006)87[1637:CIHFUP]2.0.CO;2)
- Hamer, A.J., Parris, K.M., 2013. Predation Modifies Larval Amphibian Communities in Urban Wetlands. *Wetlands* 33, 641–652. <https://doi.org/10.1007/s13157-013-0420-2>
- Harrison, S., Grace, J.B., Davies, K.F., Safford, H.D., Viers, J.H., 2018. Invasion in a Diversity Hotspot: Exotic Cover and Native Richness in the Californian Serpentine Flora. *Ecology* 87, 695–703. <https://doi.org/10.1890/05-0778>
- Heard, M.J., Sax, D.F., Bruno, J.F., 2018. Dominance of non-native species increases over time in a historically invaded strandline community. *Diversity and Distributions* 18, 1232–1242. <https://doi.org/10.1111/j.1472-4642.2012.00918.x>
- Heidinga, L., Wilson, S.D., 2002. The impact of an invading alien grass (*Agropyron cristatum*) on species turnover in native prairie. *Diversity and Distributions* 8, 249–258.  
<https://doi.org/10.1046/j.1472-4642.2002.00154.x>
- Heleno, R.H., Ceia, R.S., Ramos, J.A., Memmott, J., 2018. Effects of Alien Plants on Insect Abundance and Biomass: a Food-Web Approach. *Conservation Biology* 23, 410–419.  
<https://doi.org/10.1111/j.1523-1739.2008.01129.x>
- Hendrickx, J.P., Creese, R.G., Gribben, P.E., 2015. Impacts of a non-native gastropod with a limited distribution; less conspicuous invaders matter too. *Marine Ecology Progress Series* 537, 151–162. <https://doi.org/10.3354/meps11469>
- Hermoso, V., Clavero, M., Blanco-Garrido, F., Prenda, J., 2018. Invasive species and habitat degradation in Iberian streams: an analysis of their role in freshwater fish diversity loss. *Ecological Applications* 21, 175–188. <https://doi.org/10.1890/09-2011.1>
- Hogg, B.N., Daane, K.M., 2018. Diversity and invasion within a predator community: impacts on herbivore suppression. *Journal of Applied Ecology* 48, 453–461.  
<https://doi.org/10.1111/j.1365-2664.2010.01940.x>
- Horňák, K., Corno, G., 2012. Every Coin Has a Back Side: Invasion by *Limnohabitus planktonicus* Promotes the Maintenance of Species Diversity in Bacterial Communities. *PLOS ONE* 7, e51576. <https://doi.org/10.1371/journal.pone.0051576>
- Houlahan, J.E., Findlay, C.S., 2018. Effect of Invasive Plant Species on Temperate Wetland

- Plant Diversity. *Conservation Biology* 18, 1132–1138. <https://doi.org/10.1111/j.1523-1739.2004.00391.x>
- Ilarri, M.I., Freitas, F., Costa-Dias, S., Antunes, C., Guilhermino, L., Sousa, R., 2012. Associated macrozoobenthos with the invasive Asian clam *Corbicula fluminea*. *Journal of Sea Research* 72, 113–120. <https://doi.org/10.1016/j.seares.2011.10.002>
- Ilarri, M.I., Souza, A.T., Antunes, C., Guilhermino, L., Sousa, R., 2014. Influence of the invasive Asian clam *Corbicula fluminea* (Bivalvia: Corbiculidae) on estuarine epibenthic assemblages. *Estuarine, Coastal and Shelf Science* 143, 12–19. <https://doi.org/10.1016/j.ecss.2014.03.017>
- Ivanov, K., Lockhart, O.M., Keiper, J., Walton, B.M., 2011. Status of the exotic ant *Nylanderia flavipes* (Hymenoptera: Formicidae) in northeastern Ohio. *Biol Invasions* 13, 1945–1950. <https://doi.org/10.1007/s10530-011-0021-z>
- Jackson, M.C., Ruiz-Navarro, A., Britton, J.R., 2015. Population density modifies the ecological impacts of invasive species. *Oikos* 124, 880–887. <https://doi.org/10.1111/oik.01661>
- Jäger, H., Kowarik, I., 2018. Resilience of Native Plant Community Following Manual Control of Invasive *Cinchona pubescens* in Galápagos. *Restoration Ecology* 18, 103–112. <https://doi.org/10.1111/j.1526-100X.2010.00657.x>
- Jäger, H., Kowarik, I., Tye, A., 2009. Destruction without extinction: long-term impacts of an invasive tree species on Galápagos highland vegetation. *Journal of Ecology* 97, 1252–1263. <https://doi.org/10.1111/j.1365-2745.2009.01578.x>
- Janáč, M., Valová, Z., Roche, K., Jurajda, P., 2016. No effect of round goby *Neogobius melanostomus* colonisation on young-of-the-year fish density or microhabitat use. *Biological Invasions* 18, 2333–2347. <https://doi.org/10.1007/s10530-016-1165-7>
- Jenkins, N.J., Yeakley, J.A., Stewart, E.M., 2008. First-Year Responses To Managed Flooding Of Lower Columbia River Bottomland Vegetation Dominated By *Phalaris arundinacea*. *Wetlands* 28, 1018–1027. <https://doi.org/10.1672/06-145.1>
- Jokela, A., Arnott, S.E., Beisner, B.E., 2011. Patterns of *Bythotrephes longimanus* distribution relative to native macroinvertebrates and zooplankton prey. *Biol Invasions* 13, 2573. <https://doi.org/10.1007/s10530-011-0072-1>
- Kaiser-Bunbury, C.N., Valentin, T., Mougou, J., Matatiken, D., Ghazoul, J., 2018. The tolerance of island plant–pollinator networks to alien plants. *Journal of Ecology* 99, 202–213. <https://doi.org/10.1111/j.1365-2745.2010.01732.x>
- Kelly, D.W., Paterson, R.A., Townsend, C.R., Poulin, R., Tompkins, D.M., 2009. Has the introduction of brown trout altered disease patterns in native New Zealand fish? *Freshwater Biology* 54, 1805–1818. <https://doi.org/10.1111/j.1365-2427.2009.02228.x>
- Kerans, B.L., Dybdahl, M.F., Gangloff, M.M., Jannot, J.E., 2005. *Potamopyrgus antipodarum*: distribution, density, and effects on native macroinvertebrate assemblages in the Greater Yellowstone Ecosystem. *Journal of the North American Benthological Society* 24, 123–138. [https://doi.org/10.1899/0887-3593\(2005\)024<0123:PADDAE>2.0.CO;2](https://doi.org/10.1899/0887-3593(2005)024<0123:PADDAE>2.0.CO;2)
- Kieltyk, P., 2014. Distribution pattern of the invasive alien plant *Bunias orientalis* in Rów Podtatrzański trench, north of the Tatra Mts, Poland. *Biologia* 69. <https://doi.org/10.2478/s11756-013-0319-7>
- Klose, K., Cooper, S.D., 2012. Contrasting effects of an invasive crayfish (*Procambarus clarkii*) on two temperate stream communities. *Freshwater Biology* 57, 526–540. <https://doi.org/10.1111/j.1365-2427.2011.02721.x>
- Koch, A.J., Martin, K., Aitken, K.E.H., 2012. The relationship between introduced European

- Starlings and the reproductive activities of Mountain Bluebirds and Tree Swallows in British Columbia, Canada. *Ibis* 154, 590–600. <https://doi.org/10.1111/j.1474-919X.2012.01242.x>
- Koper, N., Mozel, K.E., Henderson, D.C., 2010. Recent declines in northern tall-grass prairies and effects of patch structure on community persistence. *Biological Conservation* 143, 220–229. <https://doi.org/10.1016/j.biocon.2009.10.006>
- Kostecki, C., Rochette, S., Girardin, R., Blanchard, M., Desroy, N., Le Pape, O., 2011. Reduction of flatfish habitat as a consequence of the proliferation of an invasive mollusc. *Estuarine, Coastal and Shelf Science* 92, 154–160. <https://doi.org/10.1016/j.ecss.2010.12.026>
- Kovalenko, K.E., Dibble, E.D., Slade, J.G., 2018. Community effects of invasive macrophyte control: role of invasive plant abundance and habitat complexity. *Journal of Applied Ecology* 47, 318–328. <https://doi.org/10.1111/j.1365-2664.2009.01768.x>
- Kwiatkowska, A.J., Spalik, K., Panufnik, D., n.d. Influence of the size and density of *Carpinus betulus* on the spatial distribution and rate of deletion of forest-floor species in thermophilous oak forest 10.
- Lang, A.C., Buschbaum, C., 2010. Facilitative effects of introduced Pacific oysters on native macroalgae are limited by a secondary invader, the seaweed *Sargassum muticum*. *Journal of Sea Research* 63, 119–128. <https://doi.org/10.1016/j.seares.2009.11.002>
- Lawrence, J.M., Samways, M.J., Henwood, J., Kelly, J., 2011. Effect of an invasive ant and its chemical control on a threatened endemic Seychelles millipede. *Ecotoxicology* 20, 731–738. <https://doi.org/10.1007/s10646-011-0614-4>
- Lederer, A., Massart, J., Janssen, J., 2006. Impact of Round Gobies (*Neogobius melanostomus*) on Dreissenids (*Dreissena polymorpha* and *Dreissena bugensis*) and the Associated Macroinvertebrate Community Across an Invasion Front. *Journal of Great Lakes Research* 32, 1–10. [https://doi.org/10.3394/0380-1330\(2006\)32\[1:IORGNM\]2.0.CO;2](https://doi.org/10.3394/0380-1330(2006)32[1:IORGNM]2.0.CO;2)
- Lederer, A.M., Janssen, J., Reed, T., Wolf, A., 2008. Impacts of the Introduced Round Goby (*Apollonia melanostoma*) on Dreissenids (*Dreissena polymorpha* and *Dreissena bugensis*) and on Macroinvertebrate Community between 2003 and 2006 in the Littoral Zone of Green Bay, Lake Michigan. *Journal of Great Lakes Research* 34, 690–697. <https://doi.org/10.3394/0380-1330-34.4.690>
- Lee, J.E., Chown, S.L., 2016. Range expansion and increasing impact of the introduced wasp *Aphidius matricariae* Haliday on sub-Antarctic Marion Island. *Biol Invasions* 18, 1235–1246. <https://doi.org/10.1007/s10530-015-0967-3>
- Lehman, J.T., Cáceres, C.E., 2018. Food-web responses to species invasion by a predatory invertebrate: Bythotrephes in Lake Michigan. *Limnology and Oceanography* 38, 879–891. <https://doi.org/10.4319/lo.1993.38.4.0879>
- Li, Y., Ke, Z., Wang, Y., Blackburn, T.M., 2011. Frog community responses to recent American bullfrog invasions. *Current Zoology* 57, 83–92. <https://doi.org/10.1093/czoolo/57.1.83>
- Lionberger, P.S., Hubert, W.A., 2007. Introduced Species and Abiotic Factors Affect Longitudinal Variation in Small Fish Assemblages in the Wind River Watershed, Wyoming. *Journal of Freshwater Ecology* 22, 287–295. <https://doi.org/10.1080/02705060.2007.9665050>
- Louda, S.M., Rand, T.A., Kula, A.A.R., Arnett, A.E., West, N.M., Tenhumberg, B., 2011. Priority resource access mediates competitive intensity between an invasive weevil and native floral herbivores. *Biological Invasions* 13, 2233–2248.

- <https://doi.org/10.1007/s10530-011-0036-5>
- Macdonald, J.I., Tonkin, Z.D., Ramsey, D.S.L., Kaus, A.K., King, A.K., Crook, D.A., 2012. Do invasive eastern gambusia (*Gambusia holbrooki*) shape wetland fish assemblage structure in south-eastern Australia? *Marine and Freshwater Research* 63, 659. <https://doi.org/10.1071/MF12019>
- Maerz, J.C., Nuzzo, V.A., Blossey, B., 2009. Declines in Woodland Salamander Abundance Associated with Non-Native Earthworm and Plant Invasions. *Conservation Biology* 23, 975–981. <https://doi.org/10.1111/j.1523-1739.2009.01167.x>
- Magoulick, D.D., DiStefano, R.J., 2007. Invasive Crayfish *Orconectes neglectus* Threatens Native Crayfishes in the Spring River Drainage of Arkansas and Missouri. *Southeastern Naturalist* 6, 141–150. [https://doi.org/10.1656/1528-7092\(2007\)6\[141:ICONTN\]2.0.CO;2](https://doi.org/10.1656/1528-7092(2007)6[141:ICONTN]2.0.CO;2)
- Mancilla, G., Valdovinos, C., Azocar, M., Jorquera, P., 2009. Replacement effect of riparian native vegetation on benthic macroinvertebrates community in temperate climate streams, Central Chile 19, 11.
- Marbà, N., Arthur, R., Alcoverro, T., 2014. Getting turfed: The population and habitat impacts of *Lophocladia lallemandii* invasions on endemic *Posidonia oceanica* meadows. *Aquatic Botany* 116, 76–82. <https://doi.org/10.1016/j.aquabot.2014.01.006>
- Marichal, R., Martinez, A.F., Praxedes, C., Ruiz, D., Carvajal, A.F., Oszwald, J., del Pilar Hurtado, M., Brown, G.G., Grimaldi, M., Desjardins, T., Sarrazin, M., Decaëns, T., Velasquez, E., Lavelle, P., 2010. Invasion of *Pontoscolex corethrurus* (Glossoscolecidae, Oligochaeta) in landscapes of the Amazonian deforestation arc. *Applied Soil Ecology* 46, 443–449. <https://doi.org/10.1016/j.apsoil.2010.09.001>
- Marshal, J.P., Bleich, V.C., Andrew, N.G., 2008. Evidence for interspecific competition between feral ass *Equus asinus* and mountain sheep *Ovis canadensis* in a desert environment. *Wildlife Biology* 14, 228–236. [https://doi.org/10.2981/0909-6396\(2008\)14\[228:EFICBF\]2.0.CO;2](https://doi.org/10.2981/0909-6396(2008)14[228:EFICBF]2.0.CO;2)
- Mashiko, M., Toquenaga, Y., 2014. Grey Heron (*Ardea cinerea*) Expansion Promotes the Persistence of Mixed-Species Heron Colonies. *Waterbirds* 37, 362–370. <https://doi.org/10.1675/063.037.0403>
- Matsuzaki, S.-I.S., Takamura, N., Arayama, K., Tominaga, A., Iwasaki, J., Washitani, I., 2011. Potential impacts of non-native channel catfish on commercially important species in a Japanese lake, as inferred from long-term monitoring data. *Aquatic Conservation: Marine and Freshwater Ecosystems* 21, 348–357. <https://doi.org/10.1002/aqc.1198>
- Mattingly, K.Z., McEwan, R.W., Paratley, R.D., Bray, S.R., Lempke, J.R., Arthur, M.A., 2016. Recovery of forest floor diversity after removal of the nonnative, invasive plant *Euonymus fortunei*. *The Journal of the Torrey Botanical Society* 143, 103–116. <https://doi.org/10.3159/TORREY-D-14-00051>
- Mayer, C.M., Keats, R.A., Rudstam, L.G., Mills, E.L., 2002. Scale-dependent effects of zebra mussels on benthic invertebrates in a large eutrophic lake. *Journal of the North American Benthological Society* 21, 616–633. <https://doi.org/10.2307/1468434>
- McAvoy, T.J., Kok, L.T., Johnson, N., 2016. A multiyear study of three plant communities with purple loosestrife and biological control agents in Virginia. *Biological Control* 94, 62–73. <https://doi.org/10.1016/j.biocontrol.2015.12.007>
- McIntosh, A.R., McHugh, P.A., Dunn, N.R., Goodman, J.M., Howard, S.W., Jellyman, P.G., O'Brien, L.K., Nyström, P., Woodford, D.J., 2010. The impact of trout on galaxiid fishes

- in New Zealand. *New Zealand Journal of Ecology* 34, 12.
- Meffin, R., Miller, A.L., Hulme, P.E., Duncan, R.P., 2010. BIODIVERSITY RESEARCH: Experimental introduction of the alien plant *Hieracium lepidulum* reveals no significant impact on montane plant communities in New Zealand. *Diversity and Distributions* 16, 804–815. <https://doi.org/10.1111/j.1472-4642.2010.00684.x>
- Melero, Y., Plaza, M., Santulli, G., Saavedra, D., Gosàlbez, J., Ruiz-Olmo, J., Palazón, S., 2012. Evaluating the effect of American mink, an alien invasive species, on the abundance of a native community: is coexistence possible? *Biodiversity and Conservation* 21, 1795–1809. <https://doi.org/10.1007/s10531-012-0277-3>
- Mills, J.E., Reinartz, J.A., Meyer, G.A., Young, E.B., 2009. Exotic shrub invasion in an undisturbed wetland has little community-level effect over a 15-year period. *Biol Invasions* 11, 1803–1820. <https://doi.org/10.1007/s10530-008-9359-2>
- Moore, J.W., Herbst, D.B., Heady, W.N., Carlson, S.M., 2012. Stream community and ecosystem responses to the boom and bust of an invading snail. *Biol Invasions* 14, 2435–2446. <https://doi.org/10.1007/s10530-012-0240-y>
- Morita, K., Tsuboi, J.-I., Matsuda, H., 2018. The impact of exotic trout on native charr in a Japanese stream. *Journal of Applied Ecology* 41, 962–972. <https://doi.org/10.1111/j.0021-8901.2004.00927.x>
- Morrison, L.W., Porter, S.D., 2003. Positive Association Between Densities of the Red Imported Fire Ant, *Solenopsis invicta* (Hymenoptera: Formicidae), and Generalized Ant and Arthropod Diversity. *Environ Entomol* 32, 548–554. <https://doi.org/10.1603/0046-225X-32.3.548>
- Múrria, C., Bonada, N., Prat, N., 2008. Effects of the invasive species *Potamopyrgus antipodarum* (Hydrobiidae, Mollusca) on community structure in a small Mediterranean stream. *Fundamental and Applied Limnology / Archiv für Hydrobiologie* 171, 131–143. <https://doi.org/10.1127/1863-9135/2008/0171-0131>
- Mutze, G., Cooke, B., Jennings, S., 2016. Density-dependent grazing impacts of introduced European rabbits and sympatric kangaroos on Australian native pastures. *Biol Invasions* 18, 2365–2376. <https://doi.org/10.1007/s10530-016-1168-4>
- Newson, S.E., Johnston, A., Parrott, D., Leech, D.I., 2011. Evaluating the population-level impact of an invasive species, Ring-necked Parakeet *Psittacula krameri*, on native avifauna. *Ibis* 153, 509–516. <https://doi.org/10.1111/j.1474-919X.2011.01121.x>
- Njambuya, J., Stiers, I., Triest, L., 2011. Competition between *Lemna minuta* and *Lemna minor* at different nutrient concentrations. *Aquatic Botany* 94, 158–164. <https://doi.org/10.1016/j.aquabot.2011.02.001>
- Novais, A., Souza, A.T., Ilarri, M., Pascoal, C., Sousa, R., 2015. From water to land: How an invasive clam may function as a resource pulse to terrestrial invertebrates. *Science of The Total Environment* 538, 664–671. <https://doi.org/10.1016/j.scitotenv.2015.08.106>
- Olson, E.R., Doherty, J.M., 2014. Macrophyte diversity–abundance relationship with respect to invasive and native dominants. *Aquatic Botany* 119, 111–119. <https://doi.org/10.1016/j.aquabot.2014.08.010>
- Oswalt, C.M., Oswalt, S.N., Clatterbuck, W.K., 2007. Effects of *Microstegium vimineum* (Trin.) A. Camus on native woody species density and diversity in a productive mixed-hardwood forest in Tennessee. *Forest Ecology and Management* 242, 727–732. <https://doi.org/10.1016/j.foreco.2007.02.008>
- Pace, M.L., Strayer, D.L., Fischer, D., Malcom, H.M., 2018. Recovery of native zooplankton



- associated with increased mortality of an invasive mussel. *Ecosphere* 1, art3.  
<https://doi.org/10.1890/ES10-00002.1>
- Parry, G., Hirst, A., 2016. Decadal decline in demersal fish biomass coincident with a prolonged drought and the introduction of an exotic starfish. *Marine Ecology Progress Series* 544, 37–52. <https://doi.org/10.3354/meps11577>
- Parsons, K., Quiring, D., Piene, H., Moreau, G., 2005. Relationship between balsam fir sawfly density and defoliation in balsam fir. *Forest Ecology and Management* 205, 325–331. <https://doi.org/10.1016/j.foreco.2004.10.033>
- Pawson, S.M., McCarthy, J.K., Ledgard, N.J., Didham, R.K., 2018. Density-dependent impacts of exotic conifer invasion on grassland invertebrate assemblages. *Journal of Applied Ecology* 47, 1053–1062. <https://doi.org/10.1111/j.1365-2664.2010.01855.x>
- Possley, J., Maschinski, J., 2006. Competitive Effects of the Invasive Grass *Rhynchelytrum repens* (Willd.) C.E. Hubb. on Pine Rockland Vegetation. *Natural Areas Journal* 26, 391–395. [https://doi.org/10.3375/0885-8608\(2006\)26\[391:CEOTIG\]2.0.CO;2](https://doi.org/10.3375/0885-8608(2006)26[391:CEOTIG]2.0.CO;2)
- Prévosto, B., Dambrine, E., Coquillard, P., Robert, A., 2006. Broom (*Cytisus scoparius*) colonization after grazing abandonment in the French Massif Central: impact on vegetation composition and resource availability. *Acta Oecologica* 30, 258–268. <https://doi.org/10.1016/j.actao.2006.05.001>
- Prior, K.M., Hellmann, J.J., 2010. Impact of an invasive oak gall wasp on a native butterfly: a test of plant-mediated competition. *Ecology* 91, 3284–3293. <https://doi.org/10.1890/09-1314.1>
- Prober, S.M., Thiele, K.R., Speijers, J., 2016. Competing drivers lead to non-linear native–exotic relationships in endangered temperate grassy woodlands. *Biological Invasions* 18, 3001–3014. <https://doi.org/10.1007/s10530-016-1194-2>
- Reusch, T.B.H., Williams, S.L., 1998. Variable responses of native eelgrass *Zostera marina* to a non-indigenous bivalve *Musculista senhousia*. *Oecologia* 113, 428–441. <https://doi.org/10.1007/s004420050395>
- Richardson, D.C., Oleksy, I.A., Hoellein, T.J., Arscott, D.B., Gibson, C.A., Root, S.M., 2014. Habitat characteristics, temporal variability, and macroinvertebrate communities associated with a mat-forming nuisance diatom (*Didymosphenia geminata*) in Catskill mountain streams, New York. *Aquatic Sciences* 76, 553–564. <https://doi.org/10.1007/s00027-014-0354-7>
- Robley, A.J., Short, J., Bradley, S., 2002. Do European rabbits (*Oryctolagus cuniculus*) influence the population ecology of the burrowing bettong (*Bettongia lesueur*)? *Wildlife Research* 29, 423. <https://doi.org/10.1071/WR01007>
- Rodriguez-Perez, H., Cayuela, H., Hilaire, S., Olivier, A., Mesleard, F., 2014. Is the exotic red swamp crayfish (*Procambarus clarkii*) a current threat for the Mediterranean tree frog (*Hyla meridionalis*) in the Camargue (Southern France)? *Hydrobiologia* 723, 145–156. <https://doi.org/10.1007/s10750-013-1481-1>
- Ross, D., Keough, M., Longmore, A., Knott, N., 2007. Impacts of two introduced suspension feeders in Port Phillip Bay, Australia. *Marine Ecology Progress Series* 340, 41–53. <https://doi.org/10.3354/meps340041>
- Ruhl, H.A., Rybicki, N.B., 2010. Long-term reductions in anthropogenic nutrients link to improvements in Chesapeake Bay habitat. *PNAS* 107, 16566–16570. <https://doi.org/10.1073/pnas.1003590107>
- Rybicki, N.B., Landwehr, J.M., 2018. Long-term changes in abundance and diversity of

- macrophyte and waterfowl populations in an estuary with exotic macrophytes and improving water quality. *Limnology and Oceanography* 52, 1195–1207.  
<https://doi.org/10.4319/lo.2007.52.3.1195>
- Sampaio, E., Rodil, I.F., n.d. Effects of the invasive clam *Corbicula fluminea* (Müller, 1774) on a representative macrobenthic community from two estuaries at different stages of invasion 14.
- Sandlund, O.T., Gjelland, K.Ø., Bøhn, T., Knudsen, R., Amundsen, P.-A., 2013. Contrasting Population and Life History Responses of a Young Morph-Pair of European Whitefish to the Invasion of a Specialised Coregonid Competitor, Vendace. *PLOS ONE* 8, e68156.  
<https://doi.org/10.1371/journal.pone.0068156>
- Schmidlin, S., Schmera, D., Baur, B., 2012. Alien molluscs affect the composition and diversity of native macroinvertebrates in a sandy flat of Lake Neuchâtel, Switzerland. *Hydrobiologia* 679, 233–249. <https://doi.org/10.1007/s10750-011-0889-8>
- Schooler, S.S., McEvoy, P.B., Coombs, E.M., 2006. Negative per capita effects of purple loosestrife and reed canary grass on plant diversity of wetland communities. *Diversity* <html\_ent glyph="@amp;" ascii="&"/> *Distributions* 12, 351–363.  
<https://doi.org/10.1111/j.1366-9516.2006.00227.x>
- Severns, P.M., Warren, A.D., 2008. Selectively eliminating and conserving exotic plants to save an endangered butterfly from local extinction. *Animal Conservation* 11, 476–483.  
<https://doi.org/10.1111/j.1469-1795.2008.00203.x>
- Sharma, G.P., 2011. LANTANA CAMARA L. INVASION AND IMPACT ON HERB LAYER DIVERSITY AND SOIL PROPERTIES IN A DRY DECIDUOUS FOREST OF INDIA. *Applied Ecology and Environmental Research* 9, 253–264.  
[https://doi.org/10.15666/aeer/0903\\_253264](https://doi.org/10.15666/aeer/0903_253264)
- Shelton, J.M., Samways, M.J., Day, J.A., 2015. Predatory impact of non-native rainbow trout on endemic fish populations in headwater streams in the Cape Floristic Region of South Africa. *Biological Invasions* 17, 365–379. <https://doi.org/10.1007/s10530-014-0735-9>
- Siebert, S.J., 2011. Patterns of plant species richness of temperate and tropical grassland in South Africa. *Plant Ecology and Evolution* 144, 249–254.
- Siesa, M.E., Padoa-Schioppa, E., Ott, J., De Bernardi, F., Ficetola, G.F., 2014. Assessing the consequences of biological invasions on species with complex life cycles: Impact of the alien crayfish *Procambarus clarkii* on Odonata. *Ecological Indicators* 46, 70–77.  
<https://doi.org/10.1016/j.ecolind.2014.05.036>
- Skórka, P., Martyka, R., Wójcik, J.D., Lenda, M., 2014. An invasive gull displaces native waterbirds to breeding habitats more exposed to native predators. *Population Ecology* 56, 359–374. <https://doi.org/10.1007/s10144-013-0429-7>
- Snyder, B.A., Callahan, M.A.J., Hendrix, P.F., 2010. Spatial variability of an invasive earthworm (*Amyntas agrestis*) population and potential impacts on soil characteristics and millipedes in the Great Smoky Mountains National Park, USA. *Biological Invasions Online First* 1–10. <https://doi.org/10.1007/s10530-010-9826-4>
- Solomon, C.T., Olden, J.D., Johnson, P.T.J., Dillon, R.T., Vander Zanden, M.J., 2010. Distribution and community-level effects of the Chinese mystery snail (*Bellamya chinensis*) in northern Wisconsin lakes. *Biol Invasions* 12, 1591–1605.  
<https://doi.org/10.1007/s10530-009-9572-7>
- Somaweera, R., Shine, R., 2012. The (non) impact of invasive cane toads on freshwater crocodiles at Lake Argyle in tropical Australia. *Animal Conservation* 15, 152–163.

- <https://doi.org/10.1111/j.1469-1795.2011.00500.x>
- Sorte, C.J.B., Stachowicz, J.J., 2011. Patterns and processes of compositional change in a California epibenthic community. *Marine Ecology Progress Series* 435, 63–74.  
<https://doi.org/10.3354/meps09234>
- Sousa, W.T.Z., Thomaz, S.M., Murphy, K.J., 2010. Response of native *Egeria najas* Planch. and invasive *Hydrilla verticillata* (L.f.) Royle to altered hydroecological regime in a subtropical river. *Aquatic Botany* 92, 40–48.  
<https://doi.org/10.1016/j.aquabot.2009.10.002>
- South, P.M., Lilley, S.A., Tait, L.W., Alestra, T., Hickford, M.J.H., Thomsen, M.S., Schiel, D.R., 2016. Transient effects of an invasive kelp on the community structure and primary productivity of an intertidal assemblage. *Marine and Freshwater Research* 67, 103.  
<https://doi.org/10.1071/MF14211>
- Spyreas, G., Wilm, B.W., Plocher, A.E., Ketzner, D.M., Matthews, J.W., Ellis, J.L., Heske, E.J., 2010. Biological consequences of invasion by reed canary grass (*Phalaris arundinacea*). *Biological Invasions* 12, 1253–1267. <https://doi.org/10.1007/s10530-009-9544-y>
- Staska, B., Essl, F., Samimi, C., 2014. Density and age of invasive *Robinia pseudoacacia* modulate its impact on floodplain forests. *Basic and Applied Ecology* 15, 551–558.  
<https://doi.org/10.1016/j.baae.2014.07.010>
- St.Clair, S.B., O'Connor, R., Gill, R., McMillan, B., 2016. Biotic resistance and disturbance: rodent consumers regulate post-fire plant invasions and increase plant community diversity. *Ecology* 97, 1700–1711. <https://doi.org/10.1002/ecy.1391>
- Steers, R.J., Funk, J.L., Allen, E.B., 2011. Can resource-use traits predict native vs. exotic plant success in carbon amended soils? *Ecological Applications* 21, 1211–1224.
- Stephens, A.E.A., Krannitz, P.G., Myers, J.H., 2009. Plant community changes after the reduction of an invasive rangeland weed, diffuse knapweed, *Centaurea diffusa*. *Biological Control* 51, 140–146. <https://doi.org/10.1016/j.biocontrol.2009.06.015>
- Stiers, I., Crohain, N., Josens, G., Triest, L., 2011. Impact of three aquatic invasive species on native plants and macroinvertebrates in temperate ponds. *Biological Invasions* 13, 2715–2726. <https://doi.org/10.1007/s10530-011-9942-9>
- Stinson, K., Kaufman, S., Durbin, L., Lowenstein, F., 2007. Impacts of Garlic Mustard Invasion on a Forest Understory Community. *Northeastern Naturalist* 14, 73–88.  
[https://doi.org/10.1656/1092-6194\(2007\)14\[73:IOGMIO\]2.0.CO;2](https://doi.org/10.1656/1092-6194(2007)14[73:IOGMIO]2.0.CO;2)
- Stireman, J.O., Devlin, H., Doyle, A.L., 2014. Habitat fragmentation, tree diversity, and plant invasion interact to structure forest caterpillar communities. *Oecologia* 176, 207–224.  
<https://doi.org/10.1007/s00442-014-3014-7>
- Strayer, D.L., Cid, N., Malcom, H.M., 2011. Long-term changes in a population of an invasive bivalve and its effects. *Oecologia* 165, 1063–1072.
- Tavernia, B.G., Reed, J.M., 2012. The Impact of Exotic Purple Loosestrife (*Lythrum salicaria*) on Wetland Bird Abundances. *The American Midland Naturalist* 168, 352–363.  
<https://doi.org/10.1674/0003-0031-168.2.352>
- Tekiela, D.R., Barney, J.N., 2018. System-level changes following invasion caused by disruption of functional relationships among plant and soil properties. *Ecosphere* 6, 1–16.  
<https://doi.org/10.1890/ES15-00412.1>
- Terauds, A., Chown, S.L., Bergstrom, D.M., 2011. Spatial scale and species identity influence the indigenous–alien diversity relationship in springtails. *Ecology* 92, 1436–1447.  
<https://doi.org/10.1890/10-2216.1>

- Thiele, J., Isermann, M., Kollmann, J., Otte, A., 2011. Impact scores of invasive plants are biased by disregard of environmental co-variation and non-linearity. *NeoBiota* 10, 65–79. <https://doi.org/10.3897/neobiota.10.1191>
- Truscott, A.-M., Palmer, S.C., Soulsby, C., Westaway, S., Hulme, P.E., 2008. Consequences of invasion by the alien plant *Mimulus guttatus* on the species composition and soil properties of riparian plant communities in Scotland. *Perspectives in Plant Ecology, Evolution and Systematics* 10, 231–240. <https://doi.org/10.1016/j.ppees.2008.04.001>
- Van Riper, C., Paxton, K.L., O'Brien, C., Shafroth, P.B., McGrath, L.J., 2008. Rethinking Avian Response to *Tamarix* on the Lower Colorado River: A Threshold Hypothesis. *Restoration Ecology* 16, 155–167. <https://doi.org/10.1111/j.1526-100X.2007.00354.x>
- VanTassel, H.L., Hansen, A.M., Barrows, C.W., Latif, Q., Simon, M.W., Anderson, K.E., 2014. Declines in a ground-dwelling arthropod community during an invasion by Sahara mustard (*Brassica tournefortii*) in aeolian sand habitats. *Biological Invasions* 16, 1675–1687. <https://doi.org/10.1007/s10530-013-0616-7>
- Vargas G., R., Gärtner, S.M., Hagen, E., Reif, A., 2013. Tree regeneration in the threatened forest of Robinson Crusoe Island, Chile: The role of small-scale disturbances on microsite conditions and invasive species. *Forest Ecology and Management* 307, 255–265. <https://doi.org/10.1016/j.foreco.2013.06.049>
- Vidra, R.L., Shear, T.H., Wentworth, T.R., 2006. Testing the Paradigms of Exotic Species Invasion in Urban Riparian Forests. *Natural Areas Journal* 26, 339–350. [https://doi.org/10.3375/0885-8608\(2006\)26\[339:TTPOES\]2.0.CO;2](https://doi.org/10.3375/0885-8608(2006)26[339:TTPOES]2.0.CO;2)
- Vrtílek, M., Reichard, M., 2012. An indirect effect of biological invasions: the effect of zebra mussel fouling on parasitisation of unionid mussels by bitterling fish. *Hydrobiologia* 696, 205–214. <https://doi.org/10.1007/s10750-012-1216-8>
- Waller, D.M., Mudrak, E.L., Amatangelo, K.L., Klionsky, S.M., Rogers, D.A., 2016. Do associations between native and invasive plants provide signals of invasive impacts? *Biological Invasions* 18, 3465–3480. <https://doi.org/10.1007/s10530-016-1238-7>
- Watkins, J.M., Dermott, R., Lozano, S.J., Mills, E.L., Rudstam, L.G., Scharold, J.V., 2007. Evidence for Remote Effects of Dreissenid Mussels on the Amphipod *Diporeia*: Analysis of Lake Ontario Benthic Surveys, 1972–2003. *Journal of Great Lakes Research* 33, 642–657. [https://doi.org/10.3394/0380-1330\(2007\)33\[642:EFREOD\]2.0.CO;2](https://doi.org/10.3394/0380-1330(2007)33[642:EFREOD]2.0.CO;2)
- Wauters, N., Dekoninck, W., Hendrickx, F., Herrera, H.W., Fournier, D., 2016. Habitat association and coexistence of endemic and introduced ant species in the Galápagos Islands. *Ecological Entomology* 41, 40–50. <https://doi.org/10.1111/een.12256>
- Weber, M.J., Brown, M.L., 2011. Relationships among invasive common carp, native fishes and physicochemical characteristics in upper Midwest (USA) lakes. *Ecology of Freshwater Fish* 20, 270–278. <https://doi.org/10.1111/j.1600-0633.2011.00493.x>
- Werner, S.M., Nordheim, E.V., Raffa, K.F., 2005. Impacts of the introduced basswood thrips (*Thrips calcaratus* Uzel) on forest health in the Great Lakes region. *Forest Ecology and Management* 214, 183–200. <https://doi.org/10.1016/j.foreco.2005.04.007>
- White, L.F., Shurin, J.B., 2011. Density dependent effects of an exotic marine macroalga on native community diversity. *Journal of Experimental Marine Biology and Ecology* 405, 111–119. <https://doi.org/10.1016/j.jembe.2011.05.024>
- Wilkie, E.M., Bishop, M.J., O'Connor, W.A., 2012. Are native *Saccostrea glomerata* and invasive *Crassostrea gigas* oysters' habitat equivalents for epibenthic communities in south-eastern Australia? *Journal of Experimental Marine Biology and Ecology* 420–421,

- 16–25. <https://doi.org/10.1016/j.jembe.2012.03.018>
- Wilsey, B.J., Daneshgar, P.P., Polley, H.W., 2011. Biodiversity, phenology and temporal niche differences between native- and novel exotic-dominated grasslands. *Perspectives in Plant Ecology, Evolution and Systematics* 13, 265–276. <https://doi.org/10.1016/j.ppees.2011.07.002>
- Wu, H., Carrillo, J., Ding, J., 2016. Invasion by alligator weed, *Alternanthera philoxeroides*, is associated with decreased species diversity across the latitudinal gradient in China. *J Plant Ecol* 9, 311–319. <https://doi.org/10.1093/jpe/rtv060>
- Yamanishi, Y., Yoshida, K., Fujimori, N., Yusa, Y., 2012. Predator-driven biotic resistance and propagule pressure regulate the invasive apple snail *Pomacea canaliculata* in Japan. *Biological Invasions* 14, 1343–1352. <https://doi.org/10.1007/s10530-011-0158-9>
- Young, K.A., Dunham, J.B., Stephenson, J.F., Terreau, A., Thailly, A.F., Gajardo, G., Leaniz, C.G. de, 2010. A trial of two trouts: comparing the impacts of rainbow and brown trout on a native galaxiid. *Animal Conservation* 13, 399–410. <https://doi.org/10.1111/j.1469-1795.2010.00354.x>
- Yurkonis, K.A., Meiners, S.J., 2004. Invasion impacts local species turnover in a successional system. *Ecology Letters* 7, 764–769. <https://doi.org/10.1111/j.1461-0248.2004.00636.x>
- Zaiko, A., Daunys, D., Olenin, S., 2009. Habitat engineering by the invasive zebra mussel *Dreissena polymorpha* (Pallas) in a boreal coastal lagoon: impact on biodiversity. *Helgoland Marine Research* 63, 85–94. <https://doi.org/10.1007/s10152-008-0135-6>
- Zuharah, W.F., Lester, P.J., 2011. Are exotic invaders less susceptible to native predators? A test using native and exotic mosquito species in New Zealand. *Population Ecology* 53, 307–317. <https://doi.org/10.1007/s10144-010-0244-3>

### SI Appendix, part 3. Supplemental Tables & Figures

Table S3.1. Distribution of IAS and habitats included in this meta-analysis. Numbers are total number of papers with studies in parentheses.

|        | Freshwater | Marine   | Terrestrial | Total     |
|--------|------------|----------|-------------|-----------|
| Animal | 43 (295)   | 27 (235) | 37 (262)    | 107 (792) |
| Plant  | 8 (21)     | 8 (77)   | 78 (358)    | 94 (456)  |

Table S3.2. Summary of model parameters and pMCMC values for comparisons between groups for each meta-analysis and regression term. Effect sizes (ES) are differences between groups within each model. pMCMC values are given in parentheses. Differences with pMCMC < 0.05 are indicated in bold font.

| Model                                  | Comparison                 | Partial-r, linear term | Partial-r, polynomial term | Slopes, linear term    | Slopes, polynomial term | Number of studies <sup>#</sup> |
|----------------------------------------|----------------------------|------------------------|----------------------------|------------------------|-------------------------|--------------------------------|
| ES ~ Response_level                    | Population vs. community   | +0.121 (0.316)         | + 0.190 (0.054)            | +0.045 (0.282)         | <b>+0.172</b> (0.026)   | 443 vs.812                     |
| ES ~ Trophic_category + Response_level | Above vs. same             | <b>-0.479</b> (0.010)  | <b>+0.427</b> (0.006)      | <b>-0.244</b> (0.002)  | <b>+0.292</b> (0.018)   | 176 vs. 541                    |
|                                        | Above vs. below            | <b>-1.049</b> (<0.001) | <b>+0.517</b> (0.004)      | <b>-0.438</b> (<0.001) | <b>+0.340</b> (0.026)   | 176 vs. 251                    |
|                                        | Same vs. below             | <b>-0.569</b> (<0.001) | +0.085 (0.400)             | <b>-0.198</b> (<0.001) | +0.055 (0.586)          | 541 vs. 251                    |
| ES ~ Response_type                     | Richness vs. diversity     | +0.295 (0.066)         | -0.078 (0.564)             | <b>+0.128</b> (0.036)  | -0.122 (0.188)          | 218 vs. 92                     |
|                                        | Richness vs. evenness      | <b>+0.602</b> (0.002)  | -0.304 (0.060)             | <b>+0.189</b> (0.004)  | <b>-0.261</b> (0.012)   | 218 vs. 52                     |
|                                        | Diversity vs. evenness     | +0.293 (0.308)         | -0.243 (0.184)             | +0.063 (0.278)         | -0.143 (0.200)          | 92 vs. 52                      |
| ES ~ Habitat + Trophic_category        | Terrestrial vs. freshwater | -0.318 (0.152)         | -0.277 (0.074)             | -0.090 (0.328)         | -0.227 (0.112)          | 566 vs. 210                    |
|                                        | Terrestrial vs. marine     | -0.408 (0.086)         | -0.040 (0.826)             | <b>-0.199</b> (0.024)  | +0.008 (0.878)          | 566 vs. 192                    |
|                                        | Freshwater vs. marine      | -0.092 (0.812)         | +0.253 (0.250)             | -0.107 (0.376)         | +0.236 (0.152)          | 210 vs. 192                    |
| ES ~ Taxon + Trophic_category          | Animal vs. plant           | <b>+0.461</b> (0.010)  | +0.220 (0.104)             | +0.103 (0.190)         | <b>+0.246</b> (0.036)   | 792 vs. 456                    |
| ES ~ Study_type <sup>§</sup>           | Spatial vs. temporal       | -0.235 (0.346)         | -0.238 (0.174)             | -0.001 (1.000)         | -0.233 (0.164)          | 553 vs. 146                    |
|                                        | Spatial vs. experimental   | -0.121 (0.608)         | +0.021 (0.892)             | -0.109 (0.180)         | +0.055 (0.678)          | 553 vs. 217                    |
|                                        | Experimental vs. temporal  | -0.122 (0.668)         | -0.269 (0.170)             | +0.104 (0.372)         | <b>-0.421</b> (0.018)   | 217 vs. 146                    |

<sup>#</sup>Number of studies associated with each group listed in the Comparison column

<sup>§</sup>For a dataset in which trophic category was known and was not “multiple”

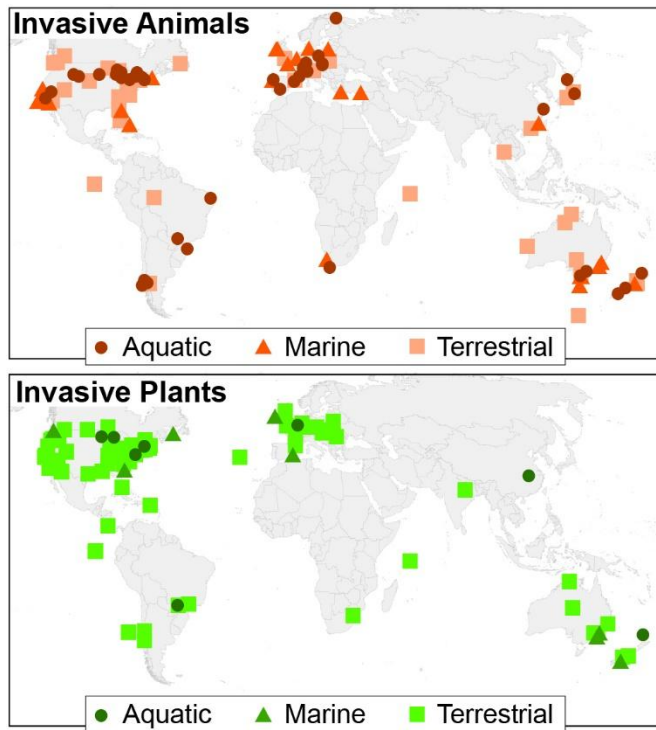

Figure S3.1. Spatial distribution of papers reporting the impact of invasive animal (top panel) and invasive plant (bottom panel) abundance on native species or communities.



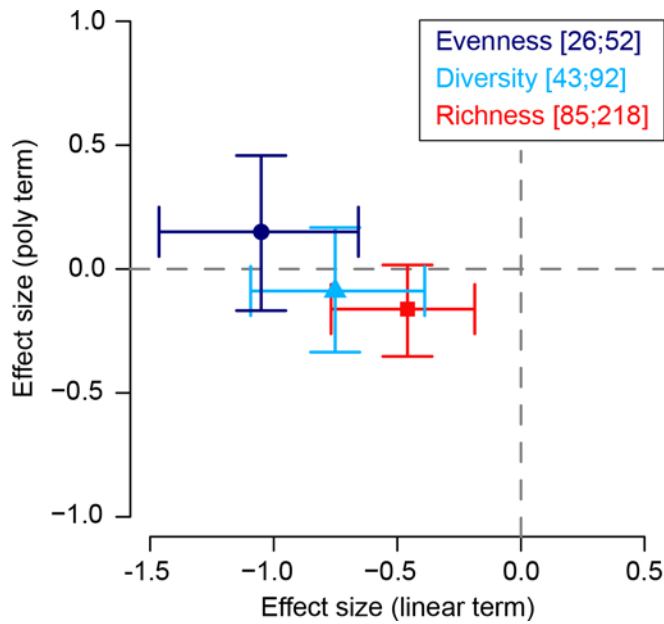

Figure S3.2 Partial-r analysis for community diversity metrics (richness, diversity, and evenness). All community diversity metrics had significant, negative linear responses to IAS abundance ( $p < 0.001$ ). The linear response of richness was significantly less negative than evenness ( $p = 0.002$ ) and marginally less negative than diversity ( $p = 0.07$ ). None of the community response metrics had a significant polynomial term in the partial-r analysis. However, richness had a marginally more negative polynomial term than evenness ( $p = 0.06$ ). Slopes analyses are consistent with these results and are presented in Figure 4.

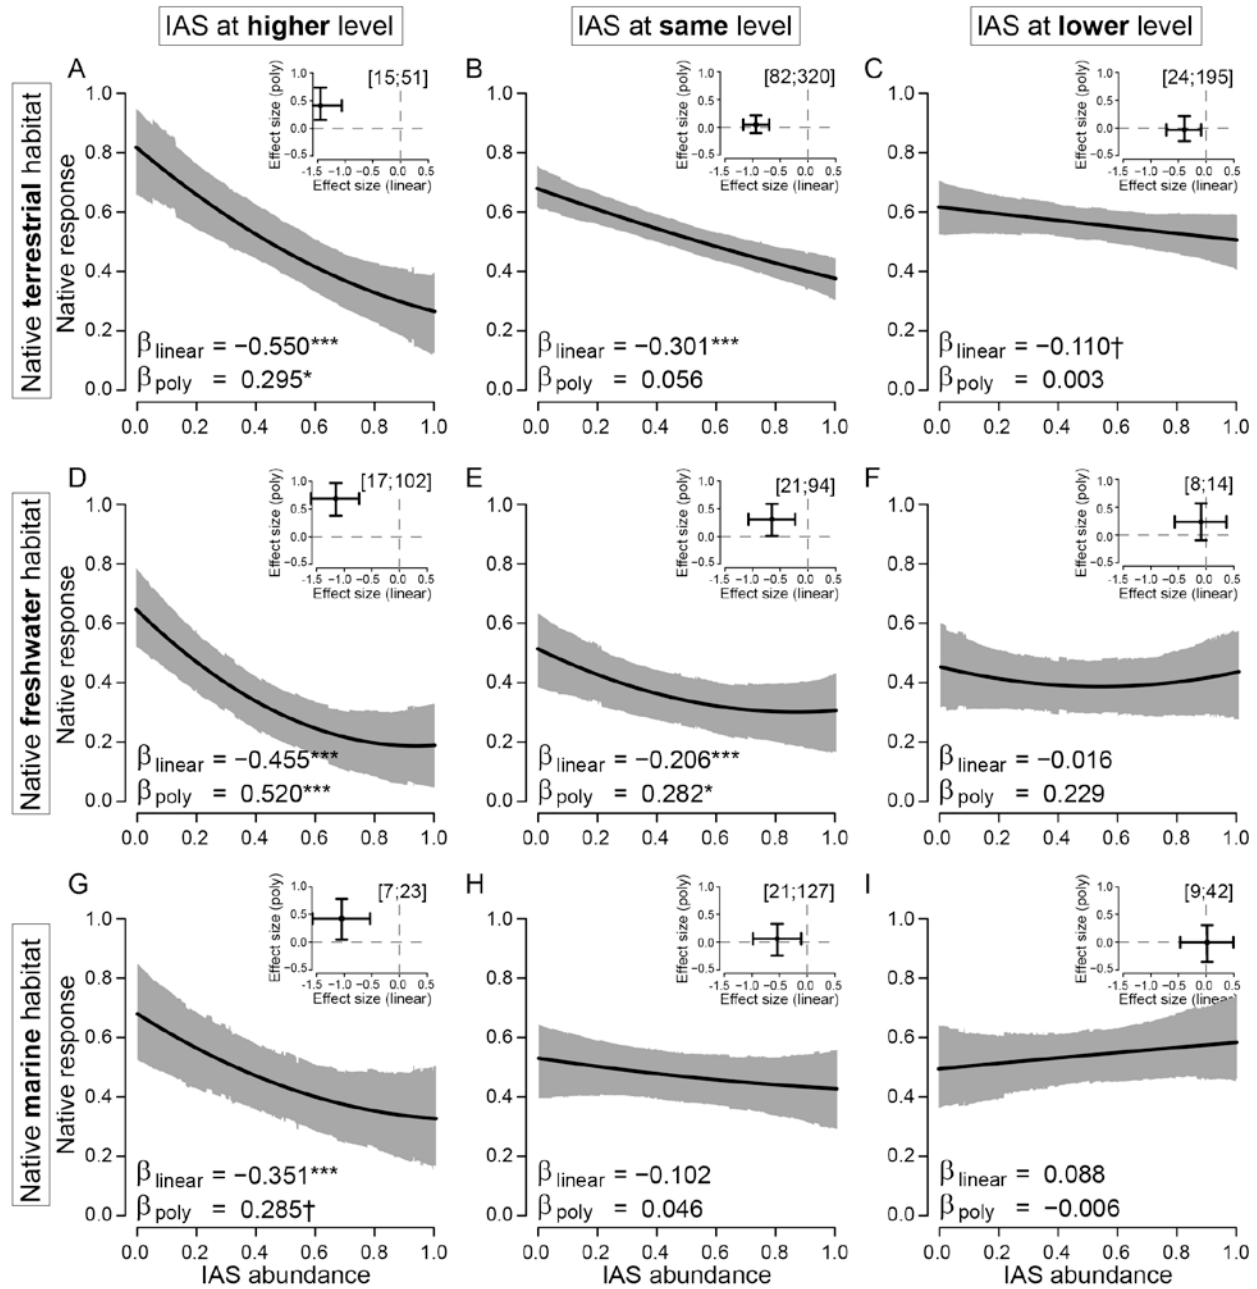

Figure S3.3. IAS impacts varied more by trophic level than by recipient habitat. Main panels show slopes analyses; insets show partial-r analyses on the same scale for comparability. A-C) Terrestrial IAS had significant non-linear impacts on native species populations and communities when invaders were at higher trophic levels. Terrestrial IAS had significant negative linear impacts when they were at the same and marginally negative linear impacts at lower trophic levels. D-F) Freshwater IAS had significant non-linear impacts when they were at higher or the same trophic levels. G-I) Marine IAS had significant negative linear and marginally positive polynomial impacts when they were at a higher trophic level. Numbers in brackets are total papers and studies analyzed, respectively. Significant partial-r effect sizes are indicated by 95% credible interval bars not crossing the zero lines. Gray shading in slopes analyses indicates the 95% credible interval. Significant linear ( $\beta_{\text{linear}}$ ) or polynomial ( $\beta_{\text{poly}}$ ) terms are indicated as follows: †  $p < 0.10$ ; \*  $p < 0.05$ ; \*\*\*  $p < 0.001$ .

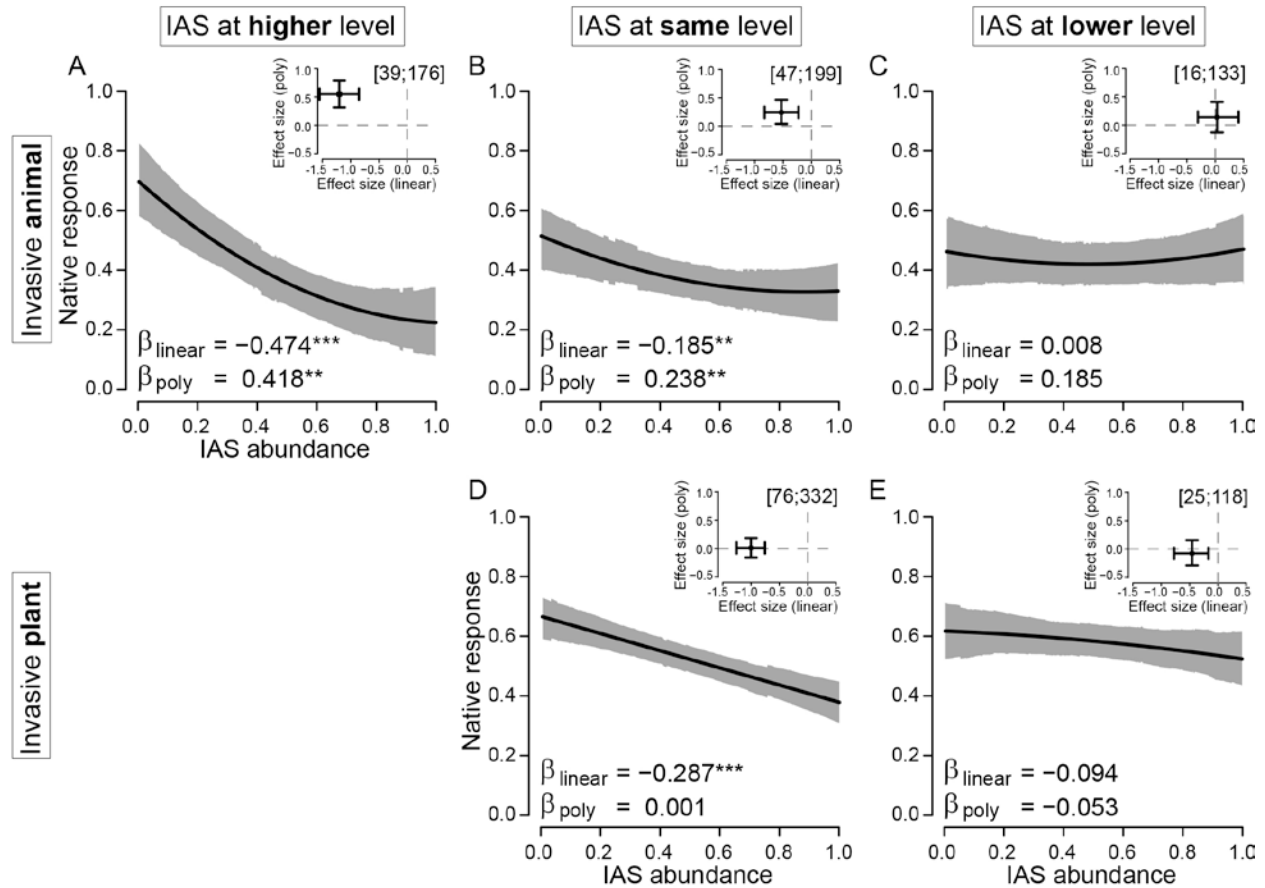

Figure S3.4. Both invasive plants and animals had negative impacts on native populations and communities. Main panels show slopes analyses; insets show partial-r analyses on the same scale for comparability. A-C) Invasive animals had significant negative, non-linear impacts on native species populations and communities when invaders were at the same or higher trophic levels. D-E) Invasive plants had significant negative linear impacts when they were at the same or lower trophic levels (no plants were at a higher trophic level). Numbers in brackets are total papers and studies analyzed, respectively. Significant partial-r effect sizes are indicated by 95% credible interval bars not crossing the zero lines. Gray shading in slopes analyses indicates the 95% credible interval. Significant linear ( $\beta_{\text{linear}}$ ) or polynomial ( $\beta_{\text{poly}}$ ) terms are indicated by asterisks (\*\*  $p < 0.01$ ; \*\*\*  $p < 0.001$ ).

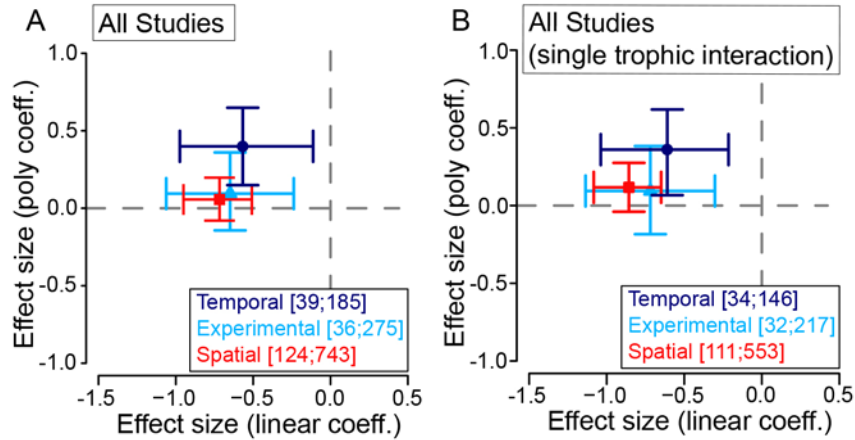

Figure S3.5. Results did not differ with study type. Plots show partial-r meta-analysis results. A) All study types showed a significant negative linear impact on native species and communities. There were not significant differences in the linear term between study types ( $p > 0.40$ ). There was a significant difference in the polynomial term between spatial and temporal studies ( $p = 0.02$ ). B) When only studies with a single trophic interaction were included (i.e. excluding studies with unknown or multiple trophic interactions to be comparable to the data analyzed in Figure 3, Figure S3.3, and Figure S3.4), there remained no significant differences in the linear term between study types ( $p > 0.35$ ) and there were also no significant differences in the polynomial term between study types ( $p > 0.17$ ).
